# Supplementary material
Source: PubMed Central journal article supplement (PMC4646324)
Supplement: supp_M115.678433_jbc.M115.678433-1.pdf [file supp_M115.678433_jbc.M115.678433-1.pdf]

**SUPPLEMENTAL TABLES**

**SUPPLEMENTAL TABLE 1. Microarray data for gene expression profiling of 12 week-old Mlip<sup>-/-</sup> vs Mlip<sup>+/+</sup> male hearts. (Excel File)**

**SUPPLEMENTAL TABLE 2. Sequences of primers used for PCR**

| <b>Gene</b>   | <b>Forward primer (5'-3')</b> | <b>Reverse primer (5'-3')</b> |
|---------------|-------------------------------|-------------------------------|
| <b>Abr</b>    | ACAAGATCATGGGCAAGGGG          | TCACTCCAAAGACGCCTGTC          |
| <b>Acad11</b> | CGCCTTGGACCTGGAAGAAT          | TTCAAGGTCAGCAAGCGGAT          |
| <b>Acadl</b>  | ATGGCAAATACTGGGCATC           | TCTTGCATCAGCTCTTTCA           |
| <b>Acadm</b>  | ACTGACGCCGTTTCAATTTT          | GCTTAGTTACACGAGGGTGATG        |
| <b>Atp5g1</b> | CCAGAGGCCCATCTAAGC            | CCCAGAATGGCATAGGAGAAG         |
| <b>Atp5l</b>  | GGCCACATTTTGGCACTACG          | GTGGCCACCAAACCATTCAG          |
| <b>Cd36</b>   | GCCAAGCTATTGCGACATGA          | AAGGCATTGGCTGGAAGAAC          |
| <b>Cdkn1A</b> | GCCTTAGCCCTCACTCTGTG          | AGCTGGCCTTAGAGGTGACA          |
| <b>Cpt1b</b>  | TGCCTTTACATCGTCTCCAA          | AGACCCCGTAGCCATCATC           |
| <b>Cpt2</b>   | CCAGCTGACCAAAGAAGCA           | GCAGCCTATCCAGTCATCGT          |
| <b>Ddit4</b>  | TCTTGTCCGCAATCTTCGCT          | GGAGGACGAGAAACGATCCC          |
| <b>Ephb1</b>  | TGCAGCAGGAAACGAGCTTA          | AATTCCCGGACGGCTTCATT          |
| <b>Fam81A</b> | CCATCTCAGAGCAGAGCACC          | GATTTTGTCAAGCCTGGCCG          |
| <b>Gapdh</b>  | GCCTCGTCCCCTAGACAAAA          | GATGGGCTTCCCCTTGTATGA         |
| <b>Glut1</b>  | AACATGGAACCACCGCTACG          | CCATAAGCACAGCAGCCACA          |
| <b>Glut2</b>  | AGGAAGAGGCATCGACTGAG          | CACAGAGACAGCCGTGAAGA          |
| <b>Glut4</b>  | CACTGCTTCTGGCTCTCACA          | GCTCTCTCCAACCTCCGT            |
| <b>Hk1</b>    | TCACCGAGCTGAAGGATGAC          | GCCGAGATCCAGTGCAATGA          |
| <b>Homer1</b> | TGCCTCCGAAAAGATCTCG           | CATGAGCTCGAGTGCTGAAGA         |
| <b>Hprt</b>   | GCGTCGTGATTAGCGATGATG         | ATCCAGCAGGTCAGCAAAGAA         |
| <b>Mt1</b>    | CCCGGAGGCCATTGTATTGT          | CAGGAGCAGCAGCCTAGAAA          |
| <b>Ndufa9</b> | ATCCCTTACCCTTTGCCACT          | CCGTAGCACCTCAATGGACT          |
| <b>Park2</b>  | GAGGAATGCGTGCTGCAAAT          | CAGTGAGTCGCAATCCCCTT          |
| <b>Pdk4</b>   | GCTTGCCAATTTCTCGTCTC          | CTTCTCCTTCGCCAGGTTCT          |
| <b>Pfkfb2</b> | GTCCATCCTCGCACCATCTA          | TCCTCTTCAACTGGCTCGTC          |
| <b>Pfkm</b>   | TTGACCTCTGGTGGAGATGC          | TTCTCGCTCTCGGCAGTCTT          |
| <b>Rgs18</b>  | TTTTGGGTCGCTGTGAAGA           | AACTCTGCTTTGTGCCGTA           |
| <b>Rplp0</b>  | CTCCAAGCAGATGCAGCAGA          | ATAGCCTTGCGCATCATGGT          |
| <b>Samd5</b>  | AAACCCCATACTCACGCAA           | CCTTTCCAGTCTTCCGCATCT         |
| <b>Setdb2</b> | AAATCAAGTGCGGTTCCCTCT         | TGGAGCAGATATGGCGATGG          |
| <b>Suclg2</b> | CCCCGAAGATGGCTGAACC           | ACCTCCTTTCAAACCGCTATTG        |
| <b>Ubc</b>    | AGCCCAGTGTTACCACCAAG          | ACCCAAGAACAAGCACAAAGG         |
| <b>Uqcrc2</b> | TGCCAGAGTTTCCAGACCTT          | CAAATGAGACACCAAAGCA           |

**SUPPLEMENTAL TABLE 3. List of antibodies used for Western blot.**

| <b>Protein detected</b>                         | <b>Manufacturer</b> | <b>Reference</b> | <b>Dilution</b> |
|-------------------------------------------------|---------------------|------------------|-----------------|
| <b>Akt (pan)</b>                                | Cell Signaling      | 4691             | 1:1000          |
| <b>AMPK<math>\alpha</math></b>                  | Cell Signaling      | 2603             | 1:1000          |
| <b>AMPK<math>\beta</math>1/2</b>                | Cell Signaling      | 4150             | 1:1000          |
| <b>Glut1</b>                                    | Abcam               | ab652            | 1:1000          |
| <b>Glut4</b>                                    | Sigma               | G4173            | 1:1000          |
| <b>Lamin A/C</b>                                | Santa Cruz          | sc-6215          | 1:1000          |
| <b>Lamin B</b>                                  | Santa Cruz          | sc-6216          | 1:1000          |
| <b>MLIP</b>                                     | Custom              | -                | 1:5000          |
| <b>mTOR</b>                                     | Cell Signaling      | 2983             | 1:1000          |
| <b>p70S6 Kinase</b>                             | Cell Signaling      | 9202             | 1:1000          |
| <b>Phospho-4E-BP1 (Thr37/46)</b>                | Cell Signaling      | 2855             | 1:1000          |
| <b>Phospho-Akt (Ser473)</b>                     | Cell Signaling      | 4060             | 1:1000          |
| <b>Phospho-Akt (Thr308)</b>                     | Cell Signaling      | 2965             | 1:1000          |
| <b>Phospho-AMPK<math>\alpha</math> (Thr172)</b> | Cell Signaling      | 2535             | 1:1000          |
| <b>Phospho-AMPK<math>\beta</math>1 (Ser108)</b> | Cell Signaling      | 4181             | 1:1000          |
| <b>Phospho-LKB1 (Ser428)</b>                    | Cell Signaling      | 3482             | 1:1000          |
| <b>Phospho-mTOR (Ser2448)</b>                   | Cell Signaling      | 5536             | 1:1000          |
| <b>Phospho-p70S6 Kinase (Ser371)</b>            | Cell Signaling      | 9208             | 1:1000          |
| <b>Phospho-p70S6 Kinase (Thr389)</b>            | Cell Signaling      | 9234             | 1:1000          |
| <b>Phospho-PDK1 (Ser241)</b>                    | Cell Signaling      | 3438             | 1:1000          |
| <b>Phospho-PTEN (Ser380)</b>                    | Cell Signaling      | 9551             | 1:1000          |
| <b>Puromycin</b>                                | Kerafast            | 3RH11            | 1:1000          |
| <b>Total OXPPOS Rodent antibody cocktail</b>    | AbCam               | Ab110413         | 1:1000          |
